# Supplementary material
Source: PubMed Central journal article supplement (PMC8173770)

# Quality Gaps and Comparative Effectiveness in Lung Cancer Staging and Diagnosis

*David E. Ost, MD, MPH; Jiangong Niu, MS; Hui Zhao, PhD; Horia B. Grosu, MD; and Sharon H. Giordano, MD*

CHEST 2020; 157(5):1322-1345

*Online supplements are not copyedited prior to posting and the author(s) take full responsibility for the accuracy of all data.*

© 2019 AMERICAN COLLEGE OF CHEST PHYSICIANS. Reproduction of this article is prohibited without written permission from the American College of Chest Physicians. See online for more details. DOI: 10.1016/j.chest.2019.09.025

## **e-Appendix 1.**

### **Methods**

SEER and TCR algorithms for determining stage:

We used `dajccstg1` to define AJCC stage, and `dajccm1`, `dajccn1` (2004+) for M0 and N1,N2,N3 stages. We used `dajcct1` to remove T4 patients. So in summary, for all SEER and TCR patients we had detailed information on their complete TNM stage (T1-T3, N1-3, and M0).

Participants and rationale for algorithm criteria

Patients in HMO's were excluded since detailed claims data were required for the analysis.

Patients with known T4 disease were excluded since patients with direct mediastinal invasion on imaging would be at least stage IIIA and lymph node sampling might not be required in such cases.<sup>1-3</sup> In the original and subsequent ACCP lung cancer guidelines, specifically the 2007 version, they describe patterns of mediastinal involvement and lymph node involvement.<sup>3,10,11</sup> When the CT or MRI shows T4 disease in this characteristic pattern staging per se is not required, rather only a tissue diagnosis. The wording in the 2007 guidelines by Detterbeck, et al. is as follows: "...In this case, it does not matter whether tissue is obtained from the primary tumor or from a mediastinal site". In the 2007 ACCP guidelines on invasive staging by Detterbeck, et al., the summary recommendation number 1 is:

For patients with extensive mediastinal infiltration of **tumor** (and no distant metastases), radiographic (CT scan) assessment of the mediastinal stage is usually sufficient without invasive confirmation. Grade of recommendation, 2C

Because staging is mainly relevant for treatment planning patients were only included if they received some form of treatment. Treatment was defined as any chemotherapy, radiation or surgery. The type of treatment received was determined by analyzing CPT codes (e-Table 1).

Test sequencing definitions, categories, and rationale

If mediastinal lymph node sampling was performed on the same day as surgical resection, this was categorized as mediastinal lymph node sampling first. Bronchoscopy without TBNA was considered as a biopsy of the peripheral lesion without mediastinal lymph node sampling. While CT-guided needle biopsy of mediastinal lymph nodes can be performed, this is rarely done since it is associated with a much higher complication rate than EBUS-TBNA and as such it represents an inferior technique. Therefore, CT-guided needle biopsy was considered as inconsistent with guidelines when done as a first procedure.

## Results:

After propensity matching, we compared survival for stage II and III patients, according to whether guideline consistent care was provided (e-Figure 1). Survival was similar whether mediastinal sampling was performed first or later for stage II disease (log-rank test  $p=0.99$ ). For patients with stage III disease patients that had mediastinal sampling done 2<sup>nd</sup> or later lived longer (log-rank test  $p<0.001$ , e-figure 1b). Note that propensity matching did not control for the type of treatment, and there were significant differences between groups in terms of whether surgery was part of the treatment. For stage III patients that had mediastinal sampling performed first, only 32% of guideline consistent care patients had surgery. Conversely, 59% of guideline inconsistent care, mediastinal sampling done 2<sup>nd</sup> or later patients had surgery.

## References:

1. Rivera MP, Mehta AC. Initial Diagnosis of Lung Cancer\*. *Chest*. 2007;132(3 suppl):131S-148S.
2. Detterbeck FC, Jantz MA, Wallace M, Vansteenkiste J, Silvestri GA. Invasive mediastinal staging of lung cancer: ACCP evidence-based clinical practice guidelines (2nd edition). *Chest*. 2007;132(3 Suppl):202S-220S.
3. Almeida FA, Uzbek M, Ost D. Initial evaluation of the nonsmall cell lung cancer patient: diagnosis and staging. *Curr Opin Pulm Med*. 2010;16(4):307-314.

**e-Table 1. ICD9 and CPT codes for determining diagnostic testing, treatments, and outcomes**

| Procedures                             | ICD-9 Diagnosis Codes | ICD-9 Procedure Codes | CPT/HCPCS codes                                                                                                                                                                                                                                                                                                                        |
|----------------------------------------|-----------------------|-----------------------|----------------------------------------------------------------------------------------------------------------------------------------------------------------------------------------------------------------------------------------------------------------------------------------------------------------------------------------|
| Diagnostic Tests                       |                       |                       |                                                                                                                                                                                                                                                                                                                                        |
| CT-guided Biopsy                       |                       |                       | 32405, 10022, 10021                                                                                                                                                                                                                                                                                                                    |
| Bronch without TBNA                    |                       |                       | 31622, 31623, 31624, 31625, 31627, 31628, 31632, 31645, no 31629                                                                                                                                                                                                                                                                       |
| Bronch with TBNA                       |                       |                       | 31629 but no 31620                                                                                                                                                                                                                                                                                                                     |
| Bronch with TBNA+EBUS                  |                       |                       | 31629 and 31620 and 31633 for additional nodes                                                                                                                                                                                                                                                                                         |
| Mediastinotomy or Mediastinoscopy      |                       |                       | 39000,39010,39220,39400,32662                                                                                                                                                                                                                                                                                                          |
| Endoscopy with ultrasound              |                       |                       | 43232                                                                                                                                                                                                                                                                                                                                  |
| Thoracotomy                            |                       |                       | 19272, 31786, 32095, 32100, 32440, 32442, 32445, 32480, 32482, 32484, 32486, 32488, 32500, 32503, 32504, 32520, 32522, 32525, 32602, 32606, 32657, 32662, 32663,38746, 32686, 32096, 32097, 32098, 32505, 32506, 32507, 32601, 32602, 32606, 32607, 32608, 32609, 32657, 32662, 32663, 32666, 32667, 32668, 32669, 32605, 32674, 38746 |
| Complications                          |                       |                       |                                                                                                                                                                                                                                                                                                                                        |
| Pneumothorax                           | 512                   |                       |                                                                                                                                                                                                                                                                                                                                        |
| Pneumothorax requiring a chest tube    | 512                   | 34.04                 | 32002,32020                                                                                                                                                                                                                                                                                                                            |
| Hemorrhage requiring blood transfusion | 998.1                 | 99.03, 99.04          | 36430                                                                                                                                                                                                                                                                                                                                  |
| Respiratory failure                    |                       | 96.04 plus 96.7       | 31500                                                                                                                                                                                                                                                                                                                                  |
| Treatments                             |                       |                       |                                                                                                                                                                                                                                                                                                                                        |
| Radiation Therapy                      |                       |                       | 77371-77373, 77401-77525, 77761-77799, G0251, G0339, G0340, G0174                                                                                                                                                                                                                                                                      |
| Chemotherapy                           |                       |                       | 96400 – 96549, J9000 – J9999, Q0083 – Q0085, J8520, J8521, J8530, J8540, J8560, J8597, J8610, J8999; EXCLUDE ALL OF THE FOLLOWING CODES: J9003, J9165, J9175, J9202, J9209, J9212-J9226, J9240, J9395                                                                                                                                  |
| Surgery                                |                       |                       | 19272, 32440, 32442, 32445, 32480, 32482, 32484, 32486, 32488, 32500, 32503, 32504, 32520, 32522, 32525, 32657, 32662, 32663,38746, 32671, 32670, 32669, 32095, 32096, 32097, 32505, 32506, 32507, 32602, 32607, 32608, 32666, 32667, 32668                                                                                            |

**e-Table 2. Surgery codes details and classification**

| Code  | Description                                                                                                                                                                              | Major resection: Involves at least segmentectomy, lobectomy, pneumonectomy, tracheal resection or chest wall resection | Wedge resection | Suitable for assessing complications due to diagnosis and/or staging in stage II patients |
|-------|------------------------------------------------------------------------------------------------------------------------------------------------------------------------------------------|------------------------------------------------------------------------------------------------------------------------|-----------------|-------------------------------------------------------------------------------------------|
| 19272 | Excision of chest wall tumor involving ribs                                                                                                                                              | Yes                                                                                                                    | No              | No                                                                                        |
| 31786 | Excision of tracheal tumor or carcinoma                                                                                                                                                  | Yes                                                                                                                    | No              | No                                                                                        |
| 32098 | Thoracotomy with biopsy of pleura                                                                                                                                                        | No                                                                                                                     | No              | Yes if not combined with another code involving lung resection                            |
| 32440 | Pneumonectomy                                                                                                                                                                            | Yes                                                                                                                    | No              | No                                                                                        |
| 32442 | Pneumonectomy                                                                                                                                                                            | Yes                                                                                                                    | No              | No                                                                                        |
| 32445 | Pneumonectomy                                                                                                                                                                            | Yes                                                                                                                    | No              | No                                                                                        |
| 32480 | Lobectomy                                                                                                                                                                                | Yes                                                                                                                    | No              | No                                                                                        |
| 32482 | Bilobectomy                                                                                                                                                                              | Yes                                                                                                                    | No              | No                                                                                        |
| 32484 | Segmentectomy                                                                                                                                                                            | Yes                                                                                                                    | No              | No                                                                                        |
| 32486 | Sleeve lobectomy                                                                                                                                                                         | Yes                                                                                                                    | No              | No                                                                                        |
| 32488 | Completion pneumonectomy                                                                                                                                                                 | Yes                                                                                                                    | No              | No                                                                                        |
| 32500 | Wedge resection, single or multiple                                                                                                                                                      | No                                                                                                                     | Yes             | Yes if not combined with another code involving lung resection                            |
| 32503 | Resection of apical lung tumor (eg, Pancoast tumor), including chest wall resection, rib(s) resection(s), neurovascular dissection, when performed; without chest wall reconstruction(s) | Yes                                                                                                                    | No              | No                                                                                        |
| 32504 | Resection of apical lung tumor (eg, Pancoast tumor), including chest wall resection, rib(s) resection(s), neurovascular dissection, when performed; with chest wall reconstruction       | Yes                                                                                                                    | No              | No                                                                                        |
| 32520 | Resection of lung with resection of chest wall                                                                                                                                           | Yes                                                                                                                    | No              | No                                                                                        |
| 32525 | Resection of lung with reconstruction chest wall without prosthesis                                                                                                                      | Yes                                                                                                                    | No              | No                                                                                        |
| 32605 | Thoracoscopy, diagnostic mediastinal space without biopsy                                                                                                                                | No                                                                                                                     | No              | Yes if not combined with another code involving lung resection                            |

|       |                                                                                                                                                           |     |     |                                                                |
|-------|-----------------------------------------------------------------------------------------------------------------------------------------------------------|-----|-----|----------------------------------------------------------------|
| 32606 | Thoracoscopy, diagnostic mediastinal space with biopsy                                                                                                    | No  | No  | Yes if not combined with another code involving lung resection |
| 32609 | Thoracoscopy, diagnostic with biopsy of pleura                                                                                                            | No  | No  | Yes if not combined with another code involving lung resection |
| 32657 | Thoracoscopy, wedge resection, single or multiple                                                                                                         | No  | Yes | Yes if not combined with another code involving lung resection |
| 32662 | Thoracoscopy, surgical; with excision of mediastinal cyst, tumor, or mass                                                                                 | Yes | No  | No                                                             |
| 32663 | Thoracoscopy, surgical; with lobectomy (single lobe)                                                                                                      | Yes | No  | No                                                             |
| 38746 | Thoracic lymphadenectomy by thoracotomy, mediastinal and regional lymphadenectomy                                                                         | No  | No  | Yes if not combined with another code involving lung resection |
| 32671 | Thoracoscopy with pneumonectomy                                                                                                                           | Yes | No  | No                                                             |
| 32670 | Thoracoscopy with bilobectomy                                                                                                                             | Yes | No  | No                                                             |
| 32669 | Thoracoscopy with segmentectomy                                                                                                                           | Yes | No  | No                                                             |
| 32095 | Thoracotomy limited for biopsy of lung or pleura, (wedge incisional)                                                                                      | Yes | No  | No                                                             |
| 32096 | Thoracotomy with dx bx of lung infiltrates, wedge, incisional                                                                                             | Yes | No  | No                                                             |
| 32097 | Thoracotomy with dx bx of lung nodule or masses, wedge, incisional                                                                                        | Yes | No  | No                                                             |
| 32505 | Thoracotomy with therapeutic wedge, initial                                                                                                               | No  | Yes | Yes if not combined with another code involving lung resection |
| 32506 | Thoracotomy with therapeutic wedge resection (nodule or mass), each additional resection, ipsilateral, list in addition to primary code                   | No  | Yes | Yes if not combined with another code involving lung resection |
| 32507 | Thoracotomy with diagnostic wedge followed by anatomic lung resection (list in addition to primary code: 32440, 32442, 32445, 32484, 32488, 32503, 32504) | Yes | No  | No                                                             |
| 32602 | Thoracoscopy, diagnostic, lungs and pleural space                                                                                                         | No  | No  | Yes if not combined with another code involving lung resection |



|       |                                                                                                                     |     |    |                                                                 |
|-------|---------------------------------------------------------------------------------------------------------------------|-----|----|-----------------------------------------------------------------|
| 32607 | Thoracoscopy, with dx biopsies of infiltrates (wedge, incisional, unilateral)                                       | No  | No | Yes if not combined with another code involving lung resection  |
| 32608 | Thoracoscopy, with dx bx of lung nodules or masses, unilateral                                                      | No  | No | Yes if not combined with another code involving lung resection  |
| 32666 | Therapeutic wedge resection, initial unilateral                                                                     | No  | No | Yes if not combined with another code involving lung resection  |
| 32667 | Therapeutic wedge resection, each addition resection, ipsilateral                                                   | Yes | No | No                                                              |
| 32668 | Thoracoscopy with wedge resection, diagnostic wedge followed by anatomic lung resection                             | Yes | No | No                                                              |
| 32100 | Thoracotomy with exploration and biopsy                                                                             | No  | No | Yes if not combined with another code involving lung resection  |
| 32522 | Remove lung & revise chest                                                                                          | Yes | No | No                                                              |
| 32601 | Thoracoscopy, diagnostic (separate procedure); lungs, pericardial sac, mediastinal or pleural space, without biopsy | No  | N  | Yes if not combined with another code where this column says No |
| 32674 | with mediastinal and regional lymphadenectomy (List separately in addition to code for primary procedure)           | No  | No | Yes if not combined with another code where this column says No |

**e-Table 3. Patient characteristics of propensity score matched cohorts**

| <b>Variables</b>   | <b>Evaluation consistent with guidelines, mediastinal sampling done first</b> | <b>Evaluation inconsistent with guidelines, mediastinal sampling performed on the 2<sup>nd</sup> or later biopsy</b> | <b>Total</b> | <b>p value</b> |
|--------------------|-------------------------------------------------------------------------------|----------------------------------------------------------------------------------------------------------------------|--------------|----------------|
|                    | <b>N (%)</b>                                                                  | <b>N (%)</b>                                                                                                         | <b>N (%)</b> |                |
| All subjects       | 3048 (100)                                                                    | 3048 (100)                                                                                                           | 6096 (100)   |                |
| Age                |                                                                               |                                                                                                                      |              | 0.925          |
| 66-70              | 1036 (34)                                                                     | 1058 (34.7)                                                                                                          | 2094 (34.4)  |                |
| 71-75              | 934 (30.6)                                                                    | 924 (30.3)                                                                                                           | 1858 (30.5)  |                |
| 76-80              | 689 (22.6)                                                                    | 689 (22.6)                                                                                                           | 1378 (22.6)  |                |
| >80                | 389 (12.8)                                                                    | 377 (12.4)                                                                                                           | 766 (12.6)   |                |
| Gender             |                                                                               |                                                                                                                      |              | 0.898          |
| Female             | 1476 (48.4)                                                                   | 1481 (48.6)                                                                                                          | 2957 (48.5)  |                |
| Male               | 1572 (51.6)                                                                   | 1567 (51.4)                                                                                                          | 3139 (51.5)  |                |
| Race               |                                                                               |                                                                                                                      |              | 0.979          |
| Non-Hispanic White | 2609 (85.6)                                                                   | 2604 (85.4)                                                                                                          | 5213 (85.5)  |                |
| Hispanic           | 134 (4.4)                                                                     | 141 (4.6)                                                                                                            | 275 (4.5)    |                |
| Non-Hispanic Black | 198 (6.5)                                                                     | 196 (6.4)                                                                                                            | 394 (6.5)    |                |
| Non-Hispanic Other | 107 (3.5)                                                                     | 107 (3.5)                                                                                                            | 214 (3.5)    |                |
| Year of Diagnosis  |                                                                               |                                                                                                                      |              | 0.990          |
| 2004               | 268 (8.8)                                                                     | 268 (8.8)                                                                                                            | 536 (8.8)    |                |
| 2005               | 319 (10.5)                                                                    | 314 (10.3)                                                                                                           | 633 (10.4)   |                |
| 2006               | 306 (10)                                                                      | 308 (10.1)                                                                                                           | 614 (10.1)   |                |
| 2007               | 312 (10.2)                                                                    | 330 (10.8)                                                                                                           | 642 (10.5)   |                |
| 2008               | 334 (11)                                                                      | 307 (10.1)                                                                                                           | 641 (10.5)   |                |
| 2009               | 314 (10.3)                                                                    | 314 (10.3)                                                                                                           | 628 (10.3)   |                |
| 2010               | 283 (9.3)                                                                     | 285 (9.4)                                                                                                            | 568 (9.3)    |                |
| 2011               | 279 (9.2)                                                                     | 282 (9.3)                                                                                                            | 561 (9.2)    |                |
| 2012               | 332 (10.9)                                                                    | 325 (10.7)                                                                                                           | 657 (10.8)   |                |
| 2013               | 301 (9.9)                                                                     | 315 (10.3)                                                                                                           | 616 (10.1)   |                |
| SEER/TCR Region    |                                                                               |                                                                                                                      |              | 0.997          |
| California         | 530 (17.4)                                                                    | 538 (17.7)                                                                                                           | 1068 (17.5)  |                |
| Connecticut        | 174 (5.7)                                                                     | 181 (5.9)                                                                                                            | 355 (5.8)    |                |
| Detroit            | 194 (6.4)                                                                     | 186 (6.1)                                                                                                            | 380 (6.2)    |                |
| Georgia            | 387 (12.7)                                                                    | 387 (12.7)                                                                                                           | 774 (12.7)   |                |
| Hawaii             | 22 (0.7)                                                                      | 26 (0.9)                                                                                                             | 48 (0.8)     |                |
| Iowa               | 132 (4.3)                                                                     | 131 (4.3)                                                                                                            | 263 (4.3)    |                |
| Kentucky           | 230 (7.6)                                                                     | 241 (7.9)                                                                                                            | 471 (7.7)    |                |

*Online supplements are not copyedited prior to posting and the author(s) take full responsibility for the accuracy of all data.*





|               |             |             |             |       |
|---------------|-------------|-------------|-------------|-------|
| Louisiana     | 115 (3.8)   | 115 (3.8)   | 230 (3.8)   |       |
| New Jersey    | 430 (14.1)  | 404 (13.3)  | 834 (13.7)  |       |
| New Mexico    | 33 (1.1)    | 27 (0.9)    | 60 (1)      |       |
| Seattle       | 144 (4.7)   | 148 (4.9)   | 292 (4.8)   |       |
| Texas         | 631 (20.7)  | 641 (21)    | 1272 (20.9) |       |
| Utah          | 26 (0.9)    | 23 (0.8)    | 49 (0.8)    |       |
| Comorbidities |             |             |             | 0.477 |
| 0             | 1325 (43.5) | 1372 (45)   | 2697 (44.2) |       |
| 1             | 988 (32.4)  | 964 (31.6)  | 1952 (32)   |       |
| 2+            | 735 (24.1)  | 712 (23.4)  | 1447 (23.7) |       |
| T stages      |             |             |             | 0.747 |
| T0/T1         | 944 (31)    | 936 (30.7)  | 1880 (30.8) |       |
| T2            | 1649 (54.1) | 1666 (54.7) | 3315 (54.4) |       |
| T3            | 260 (8.5)   | 272 (8.9)   | 532 (8.7)   |       |
| Unknown       | 195 (6.4)   | 174 (5.7)   | 369 (6.1)   |       |
| N stages      |             |             |             | 0.905 |
| N1            | 962 (31.6)  | 949 (31.1)  | 1911 (31.4) |       |
| N2            | 1846 (60.6) | 1863 (61.1) | 3709 (60.8) |       |
| N3            | 240 (7.9)   | 236 (7.7)   | 476 (7.8)   |       |
| Cancer type   |             |             |             | 0.911 |
| NSCLC         | 2879 (94.5) | 2881 (94.5) | 5760 (94.5) |       |
| Small cell    | 169 (5.5)   | 167 (5.5)   | 336 (5.5)   |       |

NSCLC: Non-small cell lung cancer

**e-Table 4. Procedure utilization and incidence of complications per procedure in patients with mediastinal sampling done**

| Invasive diagnostic test and associated complications | Mediastinal Sampling done as 1st test |              |                                      |                                            | Mediastinal Sampling done as 2nd test or later |               |                                      |                                           |
|-------------------------------------------------------|---------------------------------------|--------------|--------------------------------------|--------------------------------------------|------------------------------------------------|---------------|--------------------------------------|-------------------------------------------|
|                                                       | TBNA/<br>EBUS                         | Surgical     | Frequency of<br>test use<br>p-value‡ | Incidence of<br>complication<br>s p-value* | TBNA/<br>EBUS                                  | Surgical      | Frequency<br>of test use<br>p-value‡ | Incidence of<br>complications<br>p-value* |
|                                                       | N                                     | N            |                                      |                                            | N                                              | N             |                                      |                                           |
| Total Patients                                        | 2140                                  | 1904         |                                      |                                            | 502                                            | 3752          |                                      |                                           |
| Procedures                                            |                                       |              |                                      |                                            |                                                |               |                                      |                                           |
| CT guided biopsy (%)†                                 | 324<br>(15)                           | 68 (4)       | <0.001                               |                                            | 380<br>(76)                                    | 2791<br>(74)  | 0.1953                               |                                           |
| Complications within 1d                               |                                       |              |                                      |                                            |                                                |               |                                      |                                           |
| Pneumothorax, n (%)*                                  | 62 (19)                               | 16 (24)      |                                      | 0.407                                      | 75 (20)                                        | 713 (26)      |                                      | 0.014                                     |
| Pneumothorax requiring<br>chest tube, n (%)*          | 11 (3)                                | <11(<16<br>) |                                      | 0.718                                      | 11 (3)                                         | 140 (5)       |                                      | 0.072                                     |
| Hemorrhage, n (%)*                                    | <11<br>(<3)                           | 0 (0)        |                                      | 1.00                                       | <11<br>(<3)                                    | 30 (1)        |                                      | 1.00                                      |
| Respiratory failure, n<br>(%)*                        | <11<br>(<3)                           | <11<br>(<16) |                                      | 0.317                                      | <11<br>(<3)                                    | <11<br>(<0.4) |                                      | .318                                      |
| Bronch without TBNA (%)†                              | 79 (4)                                | 22 (1)       | <0.001                               |                                            | 286<br>(57)                                    | 1938<br>(52)  | 0.7013                               |                                           |
| Complications within 1d                               |                                       |              |                                      |                                            |                                                |               |                                      |                                           |
| Pneumothorax, n (%)                                   | <11<br>(<14)                          | 0 (0)        |                                      | 0.342                                      | 11 (4)                                         | 49 (3)        |                                      | 0.237                                     |
| Pneumothorax requiring<br>chest tube, n (%)           | <11<br>(<14)                          | 0 (0)        |                                      | 1.00                                       | <11<br>(<4)                                    | <11 (<1)      |                                      | 0.660                                     |
| Hemorrhage, n (%)                                     | <11<br>(<14)                          | 0 (0)        |                                      | 1.00                                       | <11<br>(<4)                                    | 23 (1)        |                                      | 0.352                                     |
| Respiratory failure, n<br>(%)                         | <11<br>(<14)                          | 0 (0)        |                                      | 1.00                                       | <11<br>(<4)                                    | 11 (1)        |                                      | 0.679                                     |



# CHEST™ Online Supplement

|                                             |               |               |        |        |              |               |        |       |
|---------------------------------------------|---------------|---------------|--------|--------|--------------|---------------|--------|-------|
| Bronch with TBNA (%)†                       | 2383<br>(111) | <11<br>(<0.6) | <0.001 |        | 521<br>(104) | <11<br>(<0.3) | <0.001 |       |
| Complications within 1d                     |               |               |        |        |              |               |        |       |
| Pneumothorax, n (%)                         | 39 (2)        | <11           |        | 0.155  | <11<br>(<2)  | 0 (0)         |        | 1.00  |
| Pneumothorax requiring chest tube, n (%)    | <11<br>(<0.5) | <11           |        | 0.041  | <11<br>(<2)  | 0 (0)         |        | 1.00  |
| Hemorrhage, n (%)                           | 17 (1)        | 0 (0)         |        | 1.00   | <11<br>(<2)  | 0 (0)         |        | 1.00  |
| Respiratory failure, n (%)                  | 25 (1)        | 0 (0)         |        | 1.00   | <11<br>(<2)  | 0 (0)         |        | 1.00  |
| Mediastinoscopy alone (no thoracotomy) (%)† | 200 (9)       | 1028 (5)      | <0.001 |        | 34 (7)       | 1397<br>(37)  | <0.001 |       |
| Complications within 14d                    |               |               |        |        |              |               |        |       |
| Pneumothorax, n (%)                         | 14 (7)        | 51 (5)        |        | 0.230  | <11<br>(<32) | 81 (6)        |        | 0.718 |
| Pneumothorax requiring chest tube, n (%)    | 0 (0)         | <11 (<1)      |        | 0.367  | 0 (0)        | <11<br>(<0.8) |        | 1.00  |
| Hemorrhage, n (%)                           | <11<br>(<6)   | 12 (1)        |        | 0.024  | <11<br>(<32) | 44 (3)        |        | 1.00  |
| Respiratory failure, n (%)                  | 11 (6)        | <11 (<1)      |        | <0.001 | 0 (0)        | 22 (2)        |        | 1.00  |
|                                             |               |               |        |        |              |               |        |       |
| Thoracotomy (%)†                            | 322<br>(15)   | 1205 (6)      | <0.001 |        | 91 (18)      | 2938<br>(78)  | <0.001 |       |
| Complications within 14 d                   |               |               |        |        |              |               |        |       |
| Hemorrhage, n (%)                           | 20 (6)        | 68 (6)        |        | 0.687  | <11<br>(<12) | 142 (5)       |        | 0.322 |
| Respiratory failure, n (%)                  | 11 (3)        | 38 (3)        |        | 0.859  | <11<br>(<12) | 110 (4)       |        | 0.259 |

† Strata with 10 or less patients were suppressed as per National Cancer Institute policy and are reported as "< 11" to ensure confidentiality. . \* Fisher's exact test p-value comparing complication rates between TBNA/EBUS and surgical groups. † p-value using chi-square test compares the frequency of testing utilization between groups on a per patients basis.

**e-Figure 1.** Survival in patients with NSCLC according to stage and diagnostic strategy after propensity matching. A) Patients with stage II NSCLC. B) Patients with stage III NSCLC. Diagnostic strategy is shown for each stage as follows: guideline consistent care with mediastinal sampling performed first (solid blue line), guideline inconsistent care with mediastinal sampling performed 2<sup>nd</sup> or later (solid red line). For figure 1B, log-rank p-value <0.001.

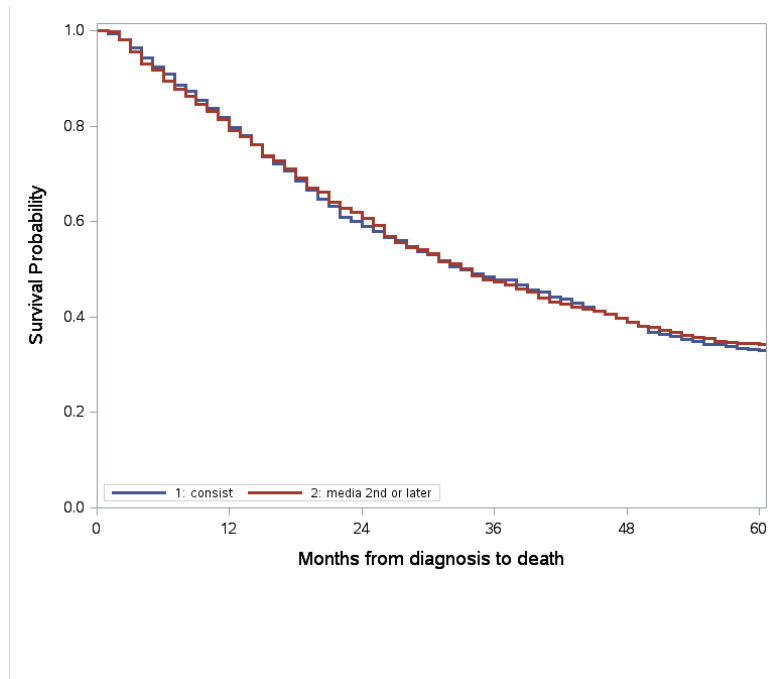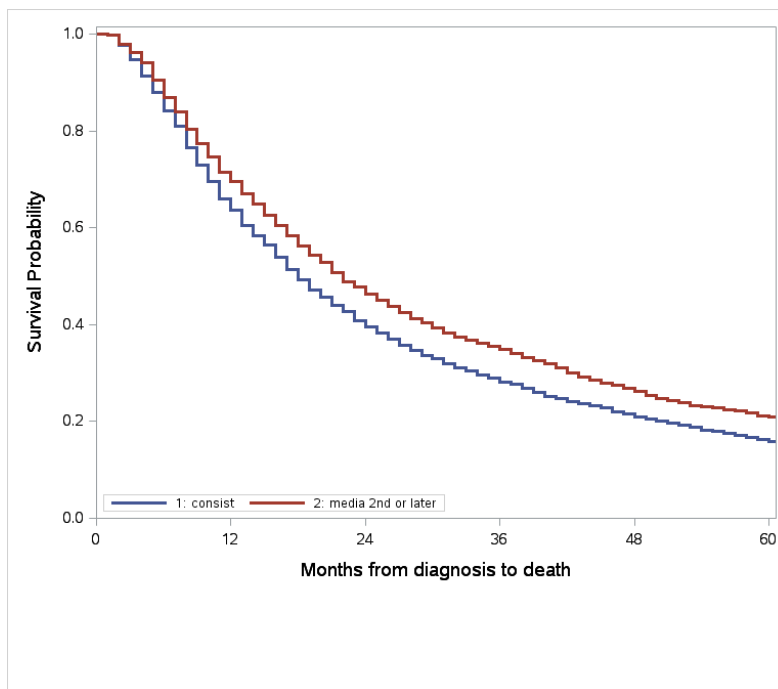

Supplement: mmc1.pdf [file mmc1.pdf]
